# Supplementary material for: Potential methane reservoirs beneath Antarctica
Source: Springer Nature journal article supplement (doi:10.1038/nature11374), 2012-08-01
Supplement: 41586_2012_BFnature11374_MOESM72_ESM.pdf [file 41586_2012_BFnature11374_MOESM72_ESM.pdf]

## 1. Sedimentary basin characteristics

A summary of the inferred characteristics of Antarctic sedimentary basins (ASBs) is presented in Suppl. Table 1, compiled from published geophysical datasets. Geophysical datasets indicate that these basins penetrate several 100km-1000km into the Antarctic interior<sup>1-4</sup>, and are associated with the onset of accelerated ice motion in ice streams and their tributaries<sup>5</sup>. The inferred origin of these sediments is marine<sup>4,6</sup>, glaci-marine and crustal sedimentary sources<sup>1</sup>. The widespread presence of dissolved methane, together with geochemical evidence for methanogenesis in marine cores, rock cores and seeps around the Antarctic margin indicates that OC is commonly cycled to methane in ocean margin basins<sup>7-12</sup>. We would expect similar processes to prevail in sedimentary basins beneath the ice sheet.

Based upon BEDMAP data and previous interpretations of this dataset<sup>4</sup>, we calculated the areas of the West (WAIS) and East Antarctic Ice Sheets (EAIS) underlain by sedimentary basins. We assume that the seaward extent of these basins is the present day grounding line and that the WAIS and EAIS were present at similar extents to the present day for 1 and ~30 Ma<sup>13-15</sup> respectively, where the 1 Ma value is maximum estimate indicated by recent modelling<sup>14</sup>. This gave aerial extents of 50% ice sheet area (or  $1 \times 10^6 \text{ km}^2$ ) for WAIS and 25% area (or  $2.5 \times 10^6 \text{ km}^2$ ) for EAIS. Combining a map of the thermal conditions at the base of the ice sheet (cold versus warm)<sup>16</sup> with the BEDMAP data for ASB extent indicates that approximately 20% of EAIS (e.g. parts of the Aurora Subglacial Basin<sup>4</sup>) and 10% of WAIS basins are in cold bed zones and likely to exhibit frozen conditions at the sediment surface. The latter are used to calculate methane hydrate accumulation under our “Zero Flux” scenario. The remaining wet-based area of

the ASBs is used to calculate the hydrate inventory for the “Maximum Flux” scenario. Further details of these scenarios can be found in Supplementary Information 2f, iii.

**Supplementary Table 1 – Summary of characteristics of sedimentary basins in East and West Antarctica as inferred from geophysical surveys**

| Sedimentary Basin Location                       | Sediment depth | Ice thickness | Reference |
|--------------------------------------------------|----------------|---------------|-----------|
| <b>East Antarctic Ice Sheet</b>                  |                |               |           |
| Wilkes Land Subglacial Basin                     | 1.5-3km        | 3km           | 1         |
| Adventure Subglacial Trench                      | 5-10km         | 3.5km         | 17,18     |
| Coats Land, Slessor Glacier (Filchner Ice Shelf) | 3 km           | 2-2.8km       | 19,20     |
| Prydz Bay Basin, Lambert Glacier                 | several km     | <2.5km        | 21 22     |
| South Pole                                       | 0.2km          | 2.8km         | 3         |
| Vostok Basin                                     | 10km           | 3.6km         | 2         |
| Aurora Basin                                     | 1km            | 3km           | 23        |
| <b>West Antarctic Ice Sheet</b>                  |                |               |           |
| Ross Sea Subglacial Basins                       |                |               |           |
| Victoria Land Basin/Terror Rift                  | 5-14km         | 2km           | 24-27     |
| Central Trough                                   | 7-8km          | 2km           | 27-29     |
| Eastern Basin (WAIS fed)                         |                |               |           |
| i. Whillans Ice Stream (B)                       | 0.6km          | 1km           | 30,31     |
| i. Kamb Ice Stream (C)                           | 0.2-2km        | 1km           | 32,33     |
| i. Ice Stream D                                  | 0.1-1km        | 1km           | 32,34     |
| v. Siple Dome                                    | 0.3km          | 1km           | 3         |
| Rutford Ice Stream (Ronne-Filchner)              | 0.6-1km        | 2-3km         | 6         |
| Mary Byrd Land                                   |                |               |           |
| Mary Byrd Land Dome                              | 0.26km         | 1.9km         | 3,35      |
| Bentley Subglacial Trench                        | 0.55km         | 3.2km         | 3,35      |

## 2. Supplementary Methods

### a. Field sampling

Subglacial sediment and debris-rich basal ice were collected from Lower Wright Glacier, (Antarctica) Russell Glacier (Greenland) and John Evans Glacier (Canadian Arctic) from marginal locations. Basal ice samples from all three sites included organic matter overridden during the late Holocene. This carbon derived from lake sediments in the Antarctic and Canadian Arctic cases, indicated by the presence of chlorophyll-containing algal cells, and from overridden paleosols in Greenland<sup>36</sup>. Details of the sites are as follows:

Lower Wright Glacier drains from the Wilson Piedmont Glacier in the McMurdo Dry Valleys region of Antarctica, and currently terminates in the permanently ice-covered Lake Brownworth. The glacier bedrock consists of Precambrian to Paleozoic metasediments, granite-gneisses and lamprophyre and rhyolite porphyry dikes, as well as Jurassic-age dolerite sills<sup>37</sup>. In the past 2-3 centuries the glacier advanced and reworked lake sediments into low moraines consisting of fine-grained sand, silt and lacustrine algae. Large blocks of frozen sediments intercalated with layers of pure glacier ice and basal ice are exposed at the terminus. The sampling was conducted from ice exposed at the crest of the moraine along the interface between the glacier and the perennially ice-covered Lake Brownworth. Three separate blocks were cut with a chain saw across a sequence in which an ice layer 21 cm thick was sandwiched between two layers of frozen mud, with algal mats along the ice mud contacts.

Russell Glacier is an outlet glacier of the western margin of the Greenland Ice Sheet. The bedrock consists of Archaean gneiss reworked in the early Proterozoic<sup>38</sup>. Analyses based on <sup>14</sup>C

dated moraines suggest a highly dynamic regional ice margin with many Holocene re-advances, including two significant re-advances between 4.8–4.4 ka BP and 2.5–2 ka BP over quaternary deposits containing fresh organic matter. From ~700 a BP to the present, the ice margin has undergone minor retreats and re-advances<sup>39</sup>. Samples were collected from the glacier terminus, where subglacial material is exposed at the ice-margins. The outermost surface of ice (up to 1 m) was removed by chain sawing in order to expose ice that was not subject to modern contamination. Then, large cube-shaped samples (~35×35×35 cm) were chain sawed from the ice, containing subglacial sediment, debris-rich basal ice and clean glacial ice.

John Evan's Glacier is a large valley glacier located at 79°40N, 74°00W, on the east coast of Ellesmere Island, Nunavut, Canada. It covers approximately 75% of a 220-km<sup>2</sup> catchment, with a length of 15 km and an elevation range of 100 to 1500 m above sea level. The glacier is polythermal, with cold-based ice in the accumulation area and at the glacier margins where ice is thin and warm-based ice throughout the remainder of the ablation zone, where basal water is present. The glacier is underlain by an Ordovician/Silurian carbonate/evaporite sequence with a minor clastic component. Shale containing small amounts of pyrite outcrops are present near the glacier terminus. Sampling was conducted in July 2002 from an exposure of basal ice in a crevasse wall at the southern margin of the glacier, using the protocols described in<sup>40</sup>. Samples were kept in sealed sterile Whirlpak bags and transported frozen to University of Alberta and stored at -20°C until transport (frozen) to Bristol in summer 2008. The sample analysed consisted of clear basal ice containing layers and lenses of fine-grained mud with obvious organic content, and some coarser material. This material was probably deposited in an ice-marginal pond and accreted onto the base of the glacier during a period of advance.

All the collected samples of debris-rich basal ice and subglacial sediment were transported frozen to the Low Temperature Experimental Facility (LOWTEX) at Bristol and stored at  $-30^{\circ}\text{C}$ . Prior to analysis and/or incubation experiments, the samples were placed in a laminar flow cabinet to prevent contamination and the outer layer (10–30 mm) of each sample was removed by washing with deionised water. The ice samples were then placed in a pre-furnaced glass bowl and allowed to thaw. The liberated sediment and the melted ice were used for further analysis. Ice samples with sediment to be used for incubation experiments (see 1b) were thawed in an anaerobic chamber under a 5% $\text{H}_2$ , 10% $\text{CO}_2$ , 85%  $\text{N}_2$  atmosphere.

**b. Incubation Experiments on subglacial overridden material**

Two grams of wet subglacial sediment with 8 ml of glacial meltwater from Lower Wright Glacier, Russell Glacier and John Evans Glacier was incubated in pre-furnaced 12 ml glass serum vials sealed with Bellco butyl rubber stoppers (Bellco Glass, Vineland, NJ), resulting in 2.5 ml of headspace in each vial. Controls were prepared by furnacing the sediment at  $140^{\circ}\text{C}$  for 5 h prior to incubation and using autoclaved deionised water instead of meltwater. Three parallels for each sample were incubated at 1, 4 and  $10^{\circ}\text{C}$  in the dark for up to 720 days. Initial microcosm preparation (defrosting sediment, weighing into vials, adding water and stoppering) was performed in an anaerobic chamber under a 5% $\text{H}_2$ , 10% $\text{CO}_2$ , 85%  $\text{N}_2$  atmosphere. Vials were then removed from the chamber and flushed for 10 minutes with a mixture of  $\text{N}_2$  with 380 ppm  $\text{CO}_2$ . They were then overpressurised to 1.5 atm with the  $\text{N}_2$ /380 ppm  $\text{CO}_2$  mix.  $\text{CH}_4$  in the headspace was analysed on a Varian 3800 gas chromatograph (Varian, Palo Alto, CA), using a  $2\text{m} \times 1/8$  inch Hayesep-Q column, 80–100 mesh size. An isothermal temperature of  $50^{\circ}\text{C}$  was used throughout the runs. The detection limit was 1.6 ppmv. Samples from all temperatures were

transferred to a cold bath (1°C) prior to measurement. The CH<sub>4</sub> concentrations in the headspace of samples from 4 and 10°C were then temperature-corrected and all concentrations were corrected for dissolved CH<sub>4</sub><sup>41</sup>. The CH<sub>4</sub> ppmv values were then converted into moles using the ideal gas law (Suppl. Equation 1).

$$n = pV/RT \times 0.000001 \times [\text{CH}_4]_{\text{ppmv}} \quad (\text{Suppl. Eq. 1})$$

where  $n$  is the amount of CH<sub>4</sub> in mol,  $p$  is the pressure (1.5 atm),  $V$  is the headspace volume (0.0025 l),  $R$  is the gas constant ( $\sim 0.0821$  l atm K<sup>-1</sup> mol<sup>-1</sup>),  $T$  is the temperature (274.15 K = 1°C), and  $[\text{CH}_4]_{\text{ppmv}}$  the concentration of CH<sub>4</sub> in ppmv.

### c. Elemental Analysis on subglacial sediments

The total carbon (TC) concentration in the basal ice and subglacial sediment samples was determined using a EuroVector EA3000 Elemental Analyser (EuroVector, Milan, Italy). The concentration of inorganic carbon (IC) was measured on a Strohlein Coulomat 702 analyser (Strohlein Instruments, Kaarst, Germany) adapted for this purpose. Both analysers were calibrated using certified standards. The detection limit was 10 ppm for both analyses, and the precision of determinations was 0.3%. The total organic carbon (TOC) concentration in the samples was calculated as the difference between TC and IC.

### d. Calculation of rates of methanogenesis from experimental data

Rates of methane production ( $R_{\text{xn}}$ , in fmol C as CH<sub>4</sub> g<sup>-1</sup> hr<sup>-1</sup>) are calculated from experimental data according to Suppl. Equation 2.

$$R_{\text{ox}} = \frac{([\text{CH}_4]_{t=0} - [\text{CH}_4]_{t=\text{final}})}{M_d \times T}$$

(Suppl. Eq. 2)

Where  $[\text{CH}_4]_{t=0}$  and  $[\text{CH}_4]_{t=\text{final}}$  are the mean amounts of methane (in fmol) measured in experimental vials minus the amount of methane measured in killed controls (in fmol, where mean values derive from triplicates) at the start ( $t=0$ ) and at the end of the incubations ( $t=\text{final}$ ) respectively.  $M_d$  is the dry mass of subglacial sediment used in incubations and  $T$  is the total incubation time in hours.

**e. Calculation of the duration of anaerobic methane oxidation (AOM) in the marine sediment/till complex**

We assume that methane oxidation largely occurs anaerobically, coupled to sulphate reduction. This is consistent with data that suggests that subglacial till is anoxic<sup>42,43</sup>. We calculate the maximum possible duration of AOM in the marine sediment/till complex in Antarctic marine sedimentary basins in the following manner. We assume that AOM occurs in a similar manner to sub-sea floor sediments, where it is coupled to sulphate reduction<sup>44</sup> (Suppl. Equation 3). Hence, the ultimate control on the amount of methane that can be oxidized is the size of the sulphate pool.

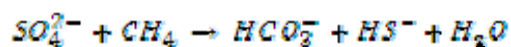

(Suppl. Eq. 3)

Sulphate in the subglacial marine sediment/till complex derives from two sources which are finite. First, sulphate is generated via the oxidation of sulphides present in the subglacial till.

Assuming a mean sulphide content for bedrock of 0.3%<sup>45</sup>, a mean rock density of 2650 kg m<sup>3</sup> and a porosity for subglacial till of 0.4<sup>46</sup>, there is approximately 15.9 kg (=133 moles) sulphide (FeS<sub>2</sub>) present in a 5 m x 1 m<sup>2</sup> till layer. This gives 265 moles of sulphate available for AOM (Suppl. Equation 4) within the same sediment volume.

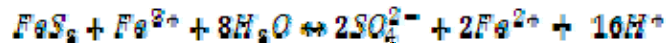

(Suppl. Eq. 4)

Second, the overridden marine sediment contains a finite sulphate pool derived from seawater. We calculate that the total sulphate pool is 630 mol based on typical Antarctic marine porewater sulphate profiles<sup>10</sup>, where the sulphate reduction zone extends to 150 m below the sea floor. As in sub-sea floor sediments, we would expect a proportion of this sulphate to be consumed by sulphate reduction that is not coupled of AOM.

Having calculated the size of the marine sediment/till complex sediment sulphate pool, we calculate the total amount of time over which AOM could occur (coupled to sulphate reduction), using rates of AOM reported in the marine literature. AOM in sub-sea floor sediments occurs within the sulphate reduction zone at rates that vary by several orders of magnitude<sup>47,48</sup> depending on factors affecting rates of microbiological activity, including the upward methane flux<sup>49</sup>. Hence, in diffusion-dominated sediments such as those described in this paper, AOM rates may be expected to be orders of magnitude lower than those in high CH<sub>4</sub> environments<sup>50</sup>.

We calculate the total amount of time (T) required for AOM to exhaust the seawater- and till-derived sulphate in Antarctic sedimentary basins (T) according to Suppl. Eq. 5:



$$T = \frac{(\text{SO}_4^{2-}\text{-till} + \text{SO}_4^{2-}\text{-marine})}{R_{\text{AOM}}V}$$

(Suppl. Eq. 5)

where  $\text{SO}_4^{2-}\text{-till}$  and  $\text{SO}_4^{2-}\text{-marine}$  are the total sulphate pools present in the subglacial till and overridden marine sediments respectively (in mol),  $R_{\text{AOM}}$  is the rate of AOM in  $\text{mol m}^{-3} \text{a}^{-1}$  and  $V$  is the volume of the sediment column in which AOM is active (assumed to be 150 m in this case). We employ a minimum rate for AOM ( $0.001 \text{ ng cm}^{-3} \text{ d}^{-1}$  or  $\sim 25 \text{ fmol g}^{-1} \text{ hr}^{-1}$ ), which scales well to our most realistic, modelled rates of methane production in surface sediments ( $10 \text{ fmol g}^{-1} \text{ hr}^{-1}$ ; see Section g) and aligns with minimum values reported in the literature for marine hydrate areas via modelling<sup>48</sup>. By using minimum rates for AOM, we generate a maximum possible duration for AOM and hence, a minimum value for methane accumulation in sediments. This gives a total of 16 ka for the amount of time ( $T$ ) needed for AOM to exhaust the sulphate pool. This duration is short relative to the duration of glaciations in Antarctica (Ma).

#### f. Numerical modelling of methane production in Antarctic Sedimentary basins

We employ a well-established 1d numerical hydrate model<sup>51</sup>, originally developed to model methane hydrate accumulation beneath the sea floor. We assume physical properties for sediments similar to those previously employed for ocean sediment modelling, and listed in<sup>51</sup>. Site specific parameters are given in Suppl. Table 2. The justification for the parameterisations which are specific to subglacial sediments are provided in the following text.

**Supplementary Table 2 Site specific parameters employed in hydrate modelling**

| Symbol      | Parameter                                    | Value                     | Units                                                                 |
|-------------|----------------------------------------------|---------------------------|-----------------------------------------------------------------------|
| $h$         | Ice thickness                                | 1000 (WAIS), 2000 (EAIS)  | m                                                                     |
| D           | Depth of hydrate stability zone              | 282 (WAIS), 663 (EAIS)    | m                                                                     |
| 2D          | Depth of conceptual domain                   | 564 (WAIS), 1326 (EAIS)   | m                                                                     |
| G           | Geothermal gradient                          | 0.05 (WAIS), 0.03 (EAIS), | $^{\circ}\text{C m}^{-1}$                                             |
| $\phi_0$    | Sediment porosity at the sediment surface    | 0.58                      | -                                                                     |
| $Z_0$       | e-folding depth of porosity                  | 2200                      | m                                                                     |
| S           | Sedimentation rate                           | 0                         | $\text{M a}^{-1}$                                                     |
| T(0)        | Sediment surface temperature                 | 0                         |                                                                       |
| TOC(0,0)    | Total organic carbon at sediment surface     | 0.2-5                     | %                                                                     |
| $\alpha(0)$ | Available organic carbon at sediment surface | 1.0                       | -                                                                     |
| $k$         | Rate constant for methanogenesis             | Variable (SF2)            | -                                                                     |
| $R_{xn}$    | Rate of methanogenesis                       | Variable (SF2)            | $\text{fmol C as CH}_4 \text{ g}^{-1} \text{ (dry sediment) hr}^{-1}$ |

The model computes the methane mass of hydrate in units of  $\text{kg m}^{-2}$ . It sums up the product of cell porosity and the fraction of porespace occupied by hydrate for the entire column. This value is then multiplied by the density of methane hydrate ( $930 \text{ kg m}^{-3}$ )<sup>52</sup>, the cell thickness (in m), and the fractional contribution of methane to the mass of the hydrate complex [i.e. 1 mole of methane hydrate has a mass of 119.65 g, the fractional contribution of methane to the mass is  $16.04/119.65=0.134$  assuming complete cage occupancy]. The results are produced in mass  $\text{CH}_4$ , hence  $\text{Kg CH}_4 \text{ m}^{-2}$ , and one can convert the areal density of methane to units of carbon by multiplying by 0.75. We also state total hydrate+gas inventories in the main manuscript in units of volume ( $\text{m}^3$ ), assuming that 1 mole of methane gas equates to  $0.0224 \text{ m}^3$  at standard

temperature and pressure.

i. **Fluid Flow.** Our assumption of zero fluid flow for simulations focussed on biogenic methane production (rather than thermogenic) is justified by there being zero sedimentation beneath the ice sheet, which would normally drive sediment compaction, and very low methane production rates. These two factors normally drive fluid flow in a typical marine sediment<sup>53</sup>. This gives us a conservative treatment of methane accumulation in this case, since fluid flow tends to enhance methane hydrate accumulation by enabling its transportation to the hydrate stability zone<sup>53</sup>. Model simulations that are conducted to test the sensitivity of methane hydrate inventories to thermogenic methane production beneath WAIS do employ fluid flow, over a spectrum of velocities found in the literature (see main article). We assume methane concentrations in the upward advecting fluid of 100% saturation.

ii. **Glacial erosion.** We appreciate that glacial erosion may lead to some sediment removal or re-distribution over time. Indeed, where ice is warm at the bed and exhibiting high rates of flow (e.g. close to the ice sheet margins), erosion rates could be considerable. For example, <sup>54</sup> estimate maximum erosion rates of  $0.6\text{mm a}^{-1}$  in ice stream tributaries, but this upstream effect is partially negated by deposition downstream in ice stream trunks. More recent work indicates that such high erosion rates are incompatible with the preservation of sedimentary basins beneath the ice sheet and that lower erosion rates must be present over a large proportion of these basins in order for sediments to still be present up to 30 Ma of glaciation<sup>19</sup>. Erosion rates of  $0.04\text{ mm a}^{-1}$  have been calculated for Slessor Glacier in East Antarctica<sup>19</sup>, and rates as low as  $0.001\text{ mm a}^{-1}$  for the Lambert basin (East Antarctica)<sup>55</sup>. For WAIS, these latter rates give 1-40m

of erosion over 1Ma, which is a small proportion of the total sediment thickness in the model (1km). For East Antarctica, where basins contain several km of sediment (see Suppl. Table 1), erosion could remove 30-1200m of sediment over 30 Ma. While we do not explicitly include erosion in the model, we do account for some removal of material by assuming a relatively low (~1km) sediment thickness (Suppl. Table 1).

iii. **Porosity and basal temperatures.** To obtain a vertical porosity profile that is representative of Antarctic subglacial sedimentary basins, we fit an exponential curve<sup>56</sup> to porosity data from the >1km-deep ANDRILL borehole drilled into a largely marine sedimentary sequence beneath the McMurdo Ice Shelf (MIS)<sup>57</sup>. Whereas this marginal sedimentary basin may have undergone some more ice sheet retreat-advance cycles than inland subglacial basins, no other deep Antarctic porosity profile is available. The linear least squares fit has the form (SF1 and 2):

$$\phi = \phi_o \exp(-z / z_o) \quad (\text{Suppl. Eq. 6})$$

with  $\phi_o$  as the fitted porosity (~0.58) at the top of the sedimentary column where  $z = 0$  and  $z_o$  as the  $e$ -folding depth (~2200m). We obtained the best fit numerically by considering 10,000 different combinations of  $\phi_o$  and  $z_o$ , and minimizing with respect to the Root Mean Square Deviation. The best fit had a RMSD of 0.12. For comparison, the worst fit, we obtained had a RMSD of 0.72.

**Supplementary Figure 1 (SF1)** Observed porosity profile from the ANDRILL borehole, with the line of best fit indicated (employed for the modelled porosity profile)

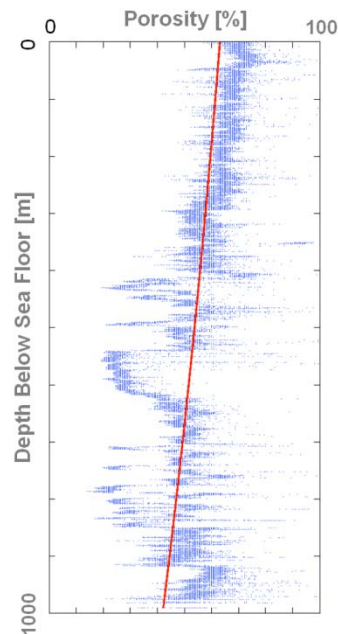

We consider two separate cases for temperature gradients in our calculation. Given that geophysical estimates of geothermal flux consistently indicate lower heat flow for East Antarctica than for West Antarctica<sup>58,59</sup>, we assume a moderate temperature gradient of 0.03 °C/m for the former and a steeper gradient of 0.05 °C/m for the latter. Using the average thermal conductivity of the sedimentary sequence in the ANDRILL MIS borehole of  $\sim 1.5 \text{ mW}/^\circ\text{C}$ <sup>57</sup>, these temperature gradients are equivalent to geothermal fluxes of 45 and 75  $\text{mW}/\text{m}^2$  respectively.

In order to consider how temperature conditions at the ice sheet sole might influence methane hydrate formation, we define two end member scenarios to take account of wet-based and cold-based conditions. Under our Maximum Flux scenario, simulating warm-based conditions, methane diffuses out of the sediment column according to the diffusion equation. Under our Zero

Flux Scenario, there is no methane diffusion out of the top of the sediment column. The latter situation is representative of frozen basal conditions or conditions at the bed where basal melt rates are very low and small fluxes of methane in a water layer at the ice-bed interface are exceeded by methane diffusion out of the top of the sediment column. In the latter case, concentration gradients of methane in the upper sediment column flatten over time and methane diffusion might reduce to very low or zero values.

#### iv. Organic matter degradation sub-model

We consider that the first order control on rates of methanogenesis is organic matter quality, rather than temperature<sup>60</sup>. This is consistent with work conducted elsewhere on marine sediments<sup>60</sup>. Hence, methane production rates in the model ( $R_{\text{xn}}(z,t)$ ) are scaled to decreasing organic matter quality with sediment age, and hence depth, using a reactive continuum model<sup>61</sup>. We prescribe an initial total organic carbon (TOC) depth profile of subglacial Antarctic marine sediments ( $\text{TOC}(z,0)$ ) that is calculated from the steady-state state solution of organic carbon using the reactive continuum model (Suppl. Equation 7) and assuming a prescribed surface organic carbon content  $\text{TOC}(0,0)$  (see Supplementary Methods 3a), as well as an age/depth model  $\text{age}(z)$ . The age/depth model is constructed using a cubic spline interpolation of observed depth/age relationships in circum-Antarctic marine sediments<sup>7</sup>. This age depth model is presented in SF2.

$$\text{TOC}(z,0) = \text{TOC}(0,0) \cdot \left( \frac{a}{a + \text{age}(z)} \right)^v$$

(Suppl. Eq. 7)

Where,  $a$  is the average life-time of the most reactive components of the bulk organic matter, and taken to be 5000 a in this case according to the relationship of “ $a$ ” with sedimentation rates<sup>61</sup>, where values for the latter are derived from our age/depth model. The parameter  $v$  (referred to as the reactivity parameter in the main manuscript) determines the shape of the underlying gamma distribution<sup>61</sup>. Sensitivity of total releasable methane accumulation to the  $v$  parameter and  $TOC(z,0)$  is explored in a full model sensitivity analysis (Supplementary Methods 3).

In a closed system (i.e. non-mixed sediment), the depth-profile of the organic matter reactivity ( $k(z,0)$ ) is calculated according to Suppl. Equation 8<sup>61,62</sup>.

$$k(z,0) = v(a + age(z))^{-1} \quad (\text{Suppl. Eq 8})$$

Hence, the initial rate of methane production by unit volume dry sediment at any depth within the sediment profile is calculated as follows:

$$R_{\text{sed}}(z,0) = k(z,0) \cdot 0.5 TOC(z,0) \quad (\text{Suppl. Eq. 9})$$

Thus, the rate of methane production by methanogenesis by unit volume porewater is calculated as follows:

$$R(z,0.5) = \left( \frac{M_{CH_4} \cdot \rho_s \cdot (1 - \phi(z))}{M_{TOC} \cdot \rho_f \cdot \phi(z)} \right) \cdot k(z,0) \cdot TOC(z,0) \quad (\text{Suppl. Eq. 10})$$

Where,  $\rho_g$  is the density of sediment grains,  $\rho_f$  denotes the density of porewater and  $M_{CH_4}/M_{TOC}$  is the ratio between the molar mass of methane and carbon. We subsequently run the model transiently for the duration of glaciation in Antarctica. In doing so, we account for the decrease in TOC over time,  $\frac{\partial TOC(z, t)}{\partial t}$  (Suppl. Equation 11), generating new values for the TOC content of sediments ( $TOC(z, t)$ ) for each depth/time interval, dependent upon the aging of the material (Suppl. Equation 12). These simulated TOC profiles and resulting rates of methanogenesis are presented in SF2 for four different time steps ( $t=0, 1 \text{ Ma}, 10\text{Ma}$  and  $30\text{Ma}$ ) for values of  $v=0.1$  and  $v=0.01$ .

$$\frac{\partial TOC(z, t)}{\partial t} = -k(z, t) \cdot TOC(z, t)$$

(Suppl. Eq. 11)

$$k(z, t) = v \cdot (\alpha + \alpha_{gs}(z) + t)$$

(Suppl. Eq. 12)

We use an additional modification of the methane production term,  $R_{xm}$ , in Suppl. Equation 9, to take into account the consumption of methane that takes place via AOM coupled to sulphate reduction in marine sedimentary sequences. This effect is parameterized in our model by setting methane production to zero in the top 150m of the model domain for the first 16 ka of the simulation time, by which time the sulphate reservoir trapped at the time of glaciation is assumed to be exhausted (see Supplementary Methods 1e for explanation). During this 16 ka, the model calculates the degradation of OM above the sulphate penetration depth (150m) by non-methanogenic pathways. This TOC degradation does obviously not contribute to  $CH_4$  generation.



**Supplementary Figure 2** a) Modelled porosity and Age/depth model employed in the modelling schema, derived from <sup>7</sup> and vertical profiles of b) TOC, c)  $k$  and d)  $R_{xn}$ , the rate of methane production per 1g of sediment (dry weight) for simulations using the two end member parameter sets (TOC(0,0)=1% and  $v=0.1$ =upper panel, and TOC(0,0)=1% ,  $v=0.01$ =lower panel).

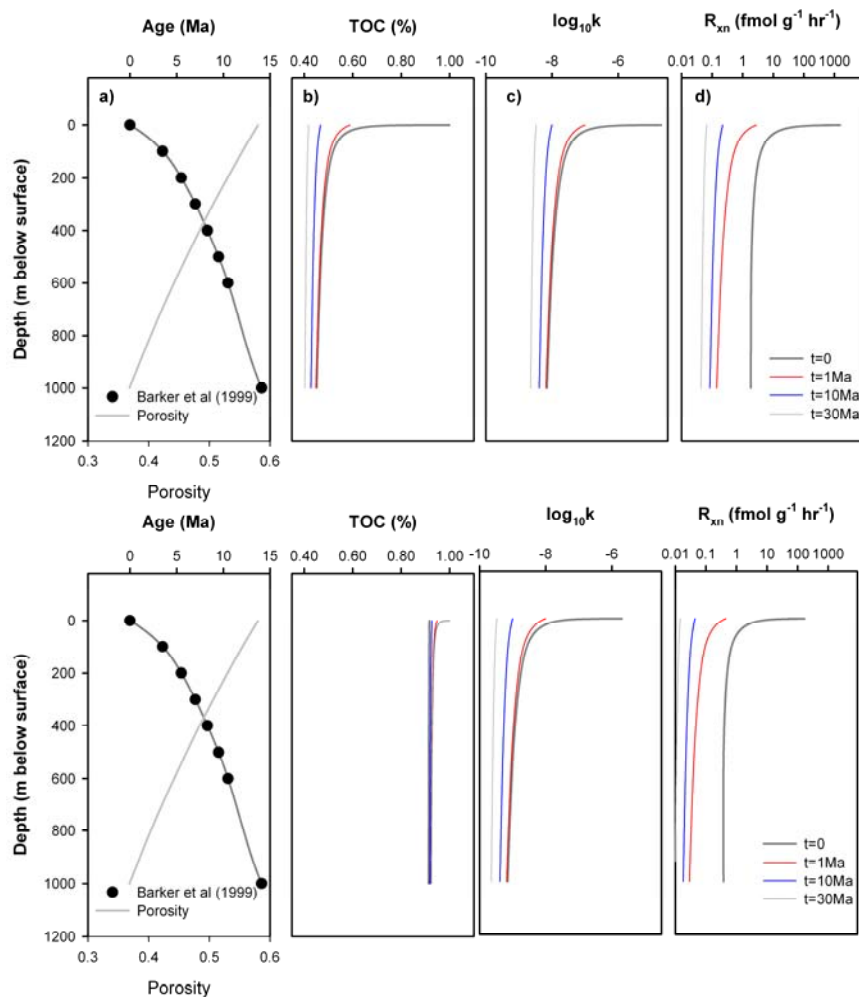

### 3. Supplementary Results – Model sensitivity analysis

The full set of model results via sensitivity analysis is presented in Suppl. Tables 3-6. Total amounts (in Pg C) of methane releasable methane (hydrate+gas) are presented for sedimentary

basins beneath EAIS and WAIS under Zero Flux and Maximum Loss Scenarios, employing a simulation time of 30 Ma for EAIS and 1 Ma for WAIS. The parameters  $v$ , OM and initial methane saturation of sediment porewaters with respect to methane are varied in the sensitivity analysis. As described in the main article, we assume areas of  $1 \times 10^6$  and  $2 \times 10^6$  km<sup>2</sup> for WAIS and EAIS respectively. These results will be referred to in the following sections.

### Supplementary Table 3 Modelled releasable methane during sensitivity testing for EAIS

(Zero Flux Scenario) for contrasting values of TOC (rows) and  $v$  (columns) [shaded cells = positive values]

| 1. EAIS, 25% Initial Saturation, Zero Flux Scenario (Hydrate+Gas in Pg C) |     |     |     |     |     |      |      |
|---------------------------------------------------------------------------|-----|-----|-----|-----|-----|------|------|
| V/TOC                                                                     | 0.2 | 0.4 | 0.6 | 0.8 | 1.0 | 2.0  | 5.0  |
| 0.01                                                                      | 0   | 0   | 7   | 16  | 26  | 72   | 310  |
| 0.1                                                                       | 25  | 70  | 124 | 201 | 286 | 874  | 2689 |
| 0.3                                                                       | 6   | 36  | 64  | 90  | 132 | 395  | 1457 |
| 0.5                                                                       | 0   | 0   | 7   | 20  | 29  | 78   | 312  |
| 1.0                                                                       | 0   | 0   | 0   | 0   | 0   | 0    | 0    |
| 2. EAIS, 50% initial Saturation, Zero Flux Scenario                       |     |     |     |     |     |      |      |
| 0.01                                                                      | 33  | 43  | 53  | 62  | 71  | 127  | 412  |
| 0.1                                                                       | 69  | 122 | 196 | 279 | 387 | 973  | 2793 |
| 0.3                                                                       | 53  | 79  | 116 | 156 | 201 | 495  | 1570 |
| 0.5                                                                       | 34  | 45  | 55  | 64  | 73  | 131  | 395  |
| 1.0                                                                       | 24  | 25  | 25  | 26  | 26  | 29   | 36   |
| 3. EAIS, 75% Initial Saturation, Zero Flux Scenario                       |     |     |     |     |     |      |      |
| 0.01                                                                      | 77  | 85  | 98  | 104 | 117 | 192  | 505  |
| 0.1                                                                       | 114 | 188 | 272 | 373 | 481 | 1076 | 2891 |
| 0.3                                                                       | 99  | 130 | 175 | 225 | 275 | 589  | 1660 |
| 0.5                                                                       | 79  | 87  | 92  | 101 | 118 | 200  | 481  |
| 1.0                                                                       | 28  | 69  | 70  | 71  | 71  | 73   | 79   |

**Supplementary Table 4 Modelled releasable methane during sensitivity testing for EAIS (Maximum Loss Scenario) for contrasting values of TOC (rows) and  $v$  (columns) [shaded cells = positive values]**

| 1. EAIS, 25% Initial Saturation, Max Flux Scenario (Hydrate+Gas in Pg C) |     |     |     |     |     |      |      |
|--------------------------------------------------------------------------|-----|-----|-----|-----|-----|------|------|
| V/TOC                                                                    | 0.2 | 0.4 | 0.6 | 0.8 | 1.0 | 2.0  | 5.0  |
| 0.01                                                                     | 0   | 0   | 0   | 0   | 0   | 0    | 0    |
| 0.1                                                                      | 0   | 0   | 0   | 0   | 0   | 1159 | 6966 |
| 0.3                                                                      | 0   | 0   | 0   | 0   | 0   | 0    | 2664 |
| 0.5                                                                      | 0   | 0   | 0   | 0   | 0   | 0    | 0    |
| 1.0                                                                      | 0   | 0   | 0   | 0   | 0   | 0    | 0    |
| 2. EAIS, 50% initial Saturation, Max Loss Scenario                       |     |     |     |     |     |      |      |
| 0.01                                                                     | 0   | 0   | 0   | 0   | 0   | 0    | 72   |
| 0.1                                                                      | 0   | 0   | 0   | 0   | 0   | 1448 | 7157 |
| 0.3                                                                      | 0   | 0   | 0   | 0   | 0   | 136  | 2949 |
| 0.5                                                                      | 0   | 0   | 0   | 0   | 0   | 0    | 0    |
| 1.0                                                                      | 0   | 0   | 0   | 0   | 0   | 0    | 0    |
| 3. EAIS, 75% Initial Saturation, Max Loss Scenario                       |     |     |     |     |     |      |      |
| 0.01                                                                     | 0   | 0   | 0   | 0   | 0   | 0    | 337  |
| 0.1                                                                      | 0   | 0   | 0   | 0   | 0   | 1759 | 7434 |
| 0.3                                                                      | 0   | 0   | 0   | 0   | 0   | 280  | 3268 |
| 0.5                                                                      | 0   | 0   | 0   | 0   | 0   | 0    | 76   |
| 1.0                                                                      | 0   | 0   | 0   | 0   | 0   | 0    | 0    |

**Supplementary Table 5 Modelled releasable methane during sensitivity testing for WAIS (Zero Flux Scenario) for contrasting values of TOC (rows) and  $v$  (columns) [shaded cells = positive values]**

| 1. WAIS, 25% Initial Saturation, Zero Flux Scenario (Hydrate+Gas in Pg C) |     |     |     |     |     |     |     |
|---------------------------------------------------------------------------|-----|-----|-----|-----|-----|-----|-----|
| V/TOC                                                                     | 0.2 | 0.4 | 0.6 | 0.8 | 1.0 | 2.0 | 5.0 |
| 0.01                                                                      | 0   | 0   | 0   | 0   | 0   | 0   | 0   |
| 0.1                                                                       | 0   | 0   | 0   | 0   | 0   | 3   | 16  |
| 0.3                                                                       | 0   | 0   | 0   | 0   | 0   | 3   | 14  |
| 0.5                                                                       | 0   | 0   | 0   | 0   | 0   | 0   | 5   |
| 1.0                                                                       | 0   | 0   | 0   | 0   | 0   | 0   | 0   |
| 2. WAIS, 50% initial Saturation, Zero Flux Scenario                       |     |     |     |     |     |     |     |
| 0.01                                                                      | 0   | 0   | 0   | 0   | 0   | 0   | 1   |
| 0.1                                                                       | 0   | 0   | 1   | 1   | 2   | 5   | 20  |
| 0.3                                                                       | 0   | 0   | 1   | 1   | 1   | 5   | 17  |
| 0.5                                                                       | 0   | 0   | 0   | 0   | 0   | 2   | 7   |
| 1.0                                                                       | 0   | 0   | 0   | 0   | 0   | 0   | 0   |
| 3. WAIS, 75% Initial Saturation, Zero Flux Scenario                       |     |     |     |     |     |     |     |
| 0.01                                                                      | 0   | 1   | 1   | 1   | 1   | 1   | 7   |
| 0.1                                                                       | 1   | 1   | 2   | 3   | 4   | 8   | 24  |
| 0.3                                                                       | 1   | 1   | 2   | 2   | 3   | 7   | 20  |
| 0.5                                                                       | 1   | 1   | 1   | 1   | 2   | 3   | 9   |
| 1.0                                                                       | 0   | 0   | 0   | 1   | 1   | 1   | 1   |

**Supplementary Table 6 Modelled releasable methane during sensitivity testing for WAIS (Maximum Loss Scenario) for contrasting values of TOC (rows) and  $v$  (columns) [shaded cells = positive values]**

| 1. WAIS, 25% Initial Saturation, Maximum Flux Scenario (Hydrate+Gas in Pg C) |     |     |     |     |     |     |     |
|------------------------------------------------------------------------------|-----|-----|-----|-----|-----|-----|-----|
| V/TOC                                                                        | 0.2 | 0.4 | 0.6 | 0.8 | 1.0 | 2.0 | 5.0 |
| 0.01                                                                         | 0   | 0   | 0   | 0   | 0   | 0   | 0   |
| 0.1                                                                          | 0   | 0   | 0   | 0   | 0   | 0   | 17  |
| 0.3                                                                          | 0   | 0   | 0   | 0   | 0   | 0   | 0   |
| 0.5                                                                          | 0   | 0   | 0   | 0   | 0   | 0   | 0   |
| 1.0                                                                          | 0   | 0   | 0   | 0   | 0   | 0   | 0   |
| 2. WAIS, 50% initial Saturation, Maximum Flux Scenario                       |     |     |     |     |     |     |     |
| 0.01                                                                         | 0   | 0   | 0   | 0   | 0   | 0   | 0   |
| 0.1                                                                          | 0   | 0   | 0   | 0   | 0   | 0   | 60  |
| 0.3                                                                          | 0   | 0   | 0   | 0   | 0   | 0   | 12  |
| 0.5                                                                          | 0   | 0   | 0   | 0   | 0   | 0   | 0   |
| 1.0                                                                          | 0   | 0   | 0   | 0   | 0   | 0   | 0   |
| 3. WAIS, 75% Initial Saturation, Maximum Flux Scenario                       |     |     |     |     |     |     |     |
| 0.01                                                                         | 0   | 0   | 0   | 0   | 0   | 0   | 0   |
| 0.1                                                                          | 0   | 0   | 0   | 0   | 0   | 0   | 167 |
| 0.3                                                                          | 0   | 0   | 0   | 0   | 0   | 0   | 65  |
| 0.5                                                                          | 0   | 0   | 0   | 0   | 0   | 0   | 0   |
| 1.0                                                                          | 0   | 0   | 0   | 0   | 0   | 0   | 0   |

a. **Sensitivity of methane production to organic carbon content and reactivity.** As in marine sediments and the deep biosphere, significant uncertainties in modelled methane production in sediments relate to the “ $v$ ” parameter (reactivity parameter) in the Reactive Continuum Model (RCM: Suppl. Equation 6), and the initial organic carbon content of surface

sediments ( $\text{TOC}(0,0)$ )<sup>61,63</sup>. The former, together with the “a” parameter, determine the distribution of organic matter reactivities with depth in the sediment column. Previous work indicates that the effect of varying the parameter “a” in the RCM is comparatively small where a is orders of magnitude lower than the total simulation period<sup>63</sup>. We prescribe an a value of 5000 a, which is the typical value employed in more refractory sediments, including the deep biosphere<sup>63</sup>, and might be expected to apply in subglacial sedimentary basins which do not receive any renewed organic matter input via sedimentation during glaciation. Since a is, therefore, orders of magnitude lower than the simulation time (1-30 Ma), we focus our sensitivity analysis upon the  $\nu$  exponent and the  $\text{TOC}(0,0)$  in the RCM. Via this sensitivity analysis, we vary  $\nu$  over a range of values observed in modern and ancient depositional environments ( $\nu=0.01-1$ )<sup>61,63</sup>. The surface organic carbon content of material in sedimentary basins at the time of ice sheet inception ( $\text{TOC}(0,0)$ ) is unknown, but might be expected to be similar to that present in offshore marine sediments around Antarctica which include material derived from marine and terrestrial deposition dating back to the Cretaceous at some Antarctic sites (e.g. <sup>64</sup>).  $\text{TOC}(0,0)$  is varied over a realistic range (0.2-5%), reflecting the spectrum of values observed in Antarctic marine sediments from the continental shelf (observed range = 0.1-9%, mean=1%: ODP legs 188 (Prydz Bay: cores 1165B, 1167A, 1165C, 1166A), 119 (Prydz Bay: core 739C, 742A), 113 (Weddell Sea:cores 693A, 696B) and 178 (Antarctic Peninsula: core 1096A). Contrary to what might be expected, marine core records from the Antarctic continental shelf display relatively high OC contents (SF2) including organic rich horizons from the late Cretaceous<sup>64</sup>. Lower concentrations of organic carbon are found in rock material cored from the Antarctic margin (mean in Cape Roberts Core CRP3=0.3%). For our end member parameterisations, we employ a  $\text{TOC}(0,0)$  of 1% in line with the mean value found in marine Antarctic cores.

Sensitivity analysis (Suppl. Tables 3-6) of methane production beneath WAIS and EAIS indicates high sensitivity to TOC(0,0) and  $v$ . In general, methane accumulation increases with increased TOC(0,0) (Fig. 2 main paper). The tendency for intermediate  $v$  values ( $v=0.1$ ) to produce the greatest methane accumulation, as reported in the main article (Fig. 2) is a direct result of methane production being highest at intermediate  $v$  values (Suppl. Tables 3-6; SF2 and SF4). For high values of  $v$  (e.g.  $v=0.5-1$ ), organic carbon is exhausted very rapidly in the upper sediment layers (SF3), where AOM dominates for the initial 16 ka. At low values of  $v$  (e.g.  $v=0.01$ ), rates of methanogenesis are simply too low to enable large amounts of methane to be produced (SFs 1&3). For intermediate  $v$  (0.1-0.3), higher TOC concentrations penetrate deeper into the sediment column and rates of degradation are sufficient to generate substantial methane, as has been observed elsewhere in Antarctic marine studies<sup>65</sup>. Following this sensitivity analysis, we selected two “most realistic” parameter sets to constrain potential methane accumulation in sub-Antarctic sediments. Both employ a value of 1% (dry weight) for the TOC(0,0) based on the mean surface TOC contents of continental shelf ODP cores. Our low end member case employs a  $v$  of 0.01, representative of more refractory organic matter, such as might be found in rocks and the terrestrial deep biosphere<sup>63,66</sup>. In our high end member case  $v=0.1$ , which is the typical value for marine sediments<sup>61</sup>.

**Supplementary Figure 3 (SF3)** Down core variations in Total Organic Carbon content (TOC) of sediments for ODP cores recovered from around the Antarctic periphery, for a) continental shelf sites, b) continental slope and deep ocean sites.

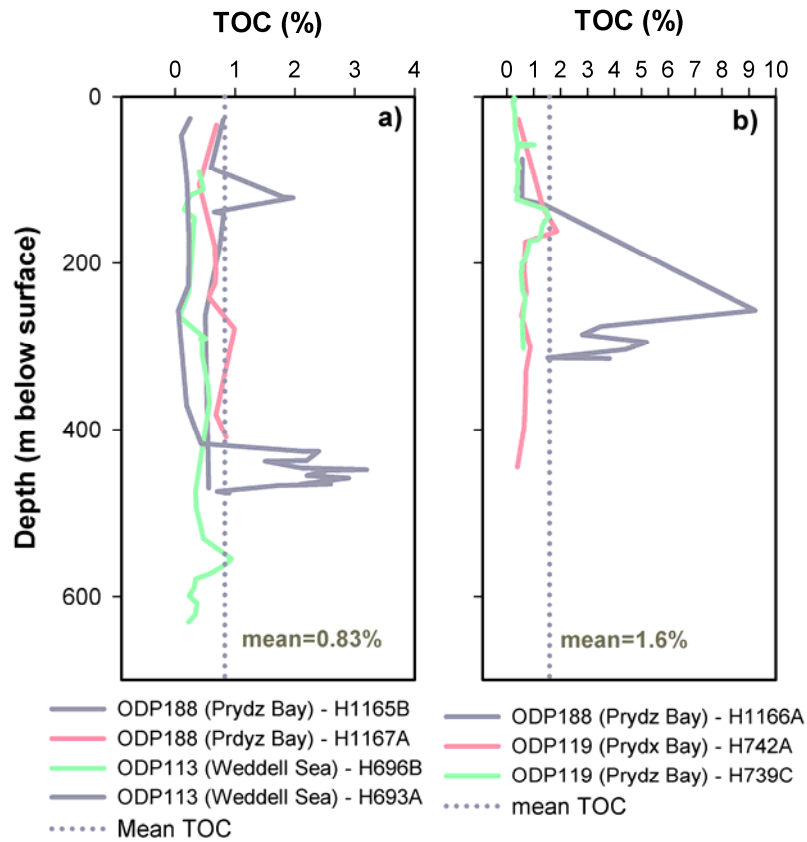



**Supplementary Figure 4** a) Modelled down-profile variation in TOC during sensitivity runs for variations in  $v$  and for time steps  $t=0, 1, 10$  and  $30$  Ma, where  $\text{TOC}(0,0)$  is fixed at 1%.  $t_0=16\text{ka}$ , in accordance for the time taken to remove the sulphate pool by AOM in the upper ( $<150\text{m}$ ) sediment column.

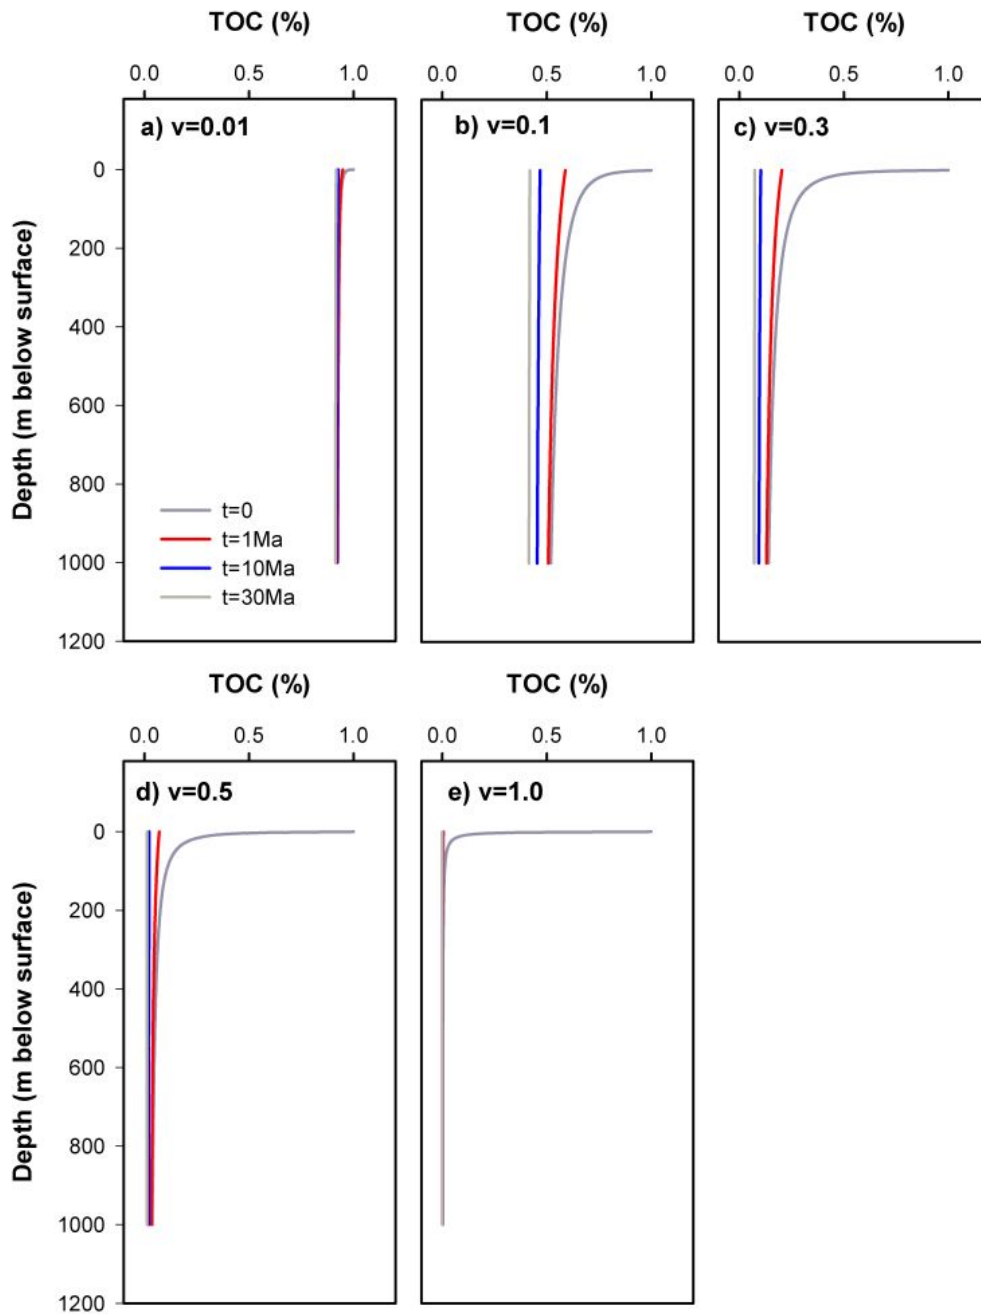

**b. Sensitivity of releasable methane accumulation to initial methane saturation in sediment porewaters**

We model three initial conditions for pre-existing methane saturation in the model domain, a) 75% saturation (S1), b) 50% saturation (S2) and c) 25% saturation (S3) with respect to methane. ODP core records from Antarctica indicate that condition b) might be the most realistic case (ODP Leg 188, core 1165; ODP Leg 178, core 1096). Hence, we report only data from the 50% saturation initial condition model simulations reported in the main article.

**c. Sensitivity of methane accumulation to ice thickness**

To account for the effect of ice sheet weight on subglacial pressure, we run our model assuming a range of ice thicknesses, starting from zero up to 4000m in 500m intervals for EAIS under the Zero Flux Scenario ( $v=0.1$ ,  $\text{TOC}(0,0)=1\%$ ). Ice thickness was converted to pressure assuming an ice density of  $910 \text{ kg/m}^3$  and acceleration due to gravity of  $9.8 \text{ m/s}^2$ . This pressure is applied to the top of the simulated sedimentary columns, with pressure increasing down profile following a hydrostatic relationship (e.g. <sup>67</sup>, their equation 1) within the column itself. The releasable methane inventory falls to zero at around a few 100m ice thickness (SF5).

**Supplementary Figure 5** Sensitivity of releasable methane formation to ice thickness, which affects the pressure distribution in sediments, for EAIS in the Zero Flux Scenario ( $v=0.1$ ,  $\text{TOC}(0,0)=1\%$ ).

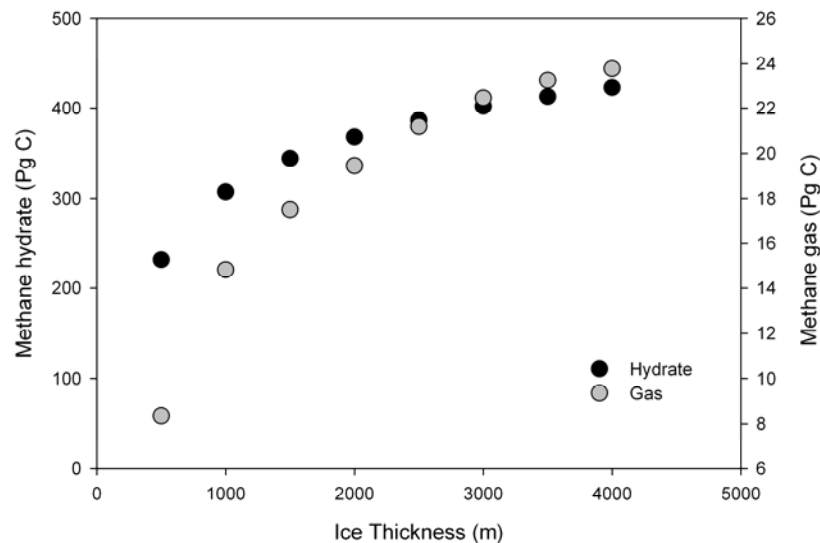

**d. Temporal control upon methane hydrate accumulation in Antarctic sedimentary basins**

In order to determine the sensitivity of methane hydrate accumulation beneath EAIS and WAIS to the duration of glaciation in sedimentary basins, we conducted a sub-set of model simulations (SF6). We employ Zero Flux and Maximum Flux Scenarios for EAIS and WAIS for different initial concentrations of methane in porewaters (25-75 % saturation), a TOC of 1% and reactivity parameter of 0.1. Results are shown in SF6. For Zero Flux scenarios, methane hydrate accumulation increases with the duration of glaciation. For Maximum Flux scenarios, only simulations for the 75% initial saturation state for EAIS produce methane hydrate, which reaches a maximum accumulation after c. 10 Ma. This result is typical of our Maximum Flux results for EAIS and reflects the tendency for methane loss by diffusion to dominate over methane

production over long simulation times, due to decreasing organic matter reactivity over time.

**Supplementary Figure 6** Sensitivity of methane hydrate formation (in Pg C) to simulation time for different initial methane concentrations in porewaters (0.25-0.75 Ceq, where Ceq is the equilibrium concentration of methane) for a) EAIS and b) WAIS. Note – only C-CH<sub>4</sub>=0.75 Ceq give methane hydrate accumulation for the EAIS Maximum Flux Scenarios. For WAIS, only Zero Flux scenario results produce hydrate.

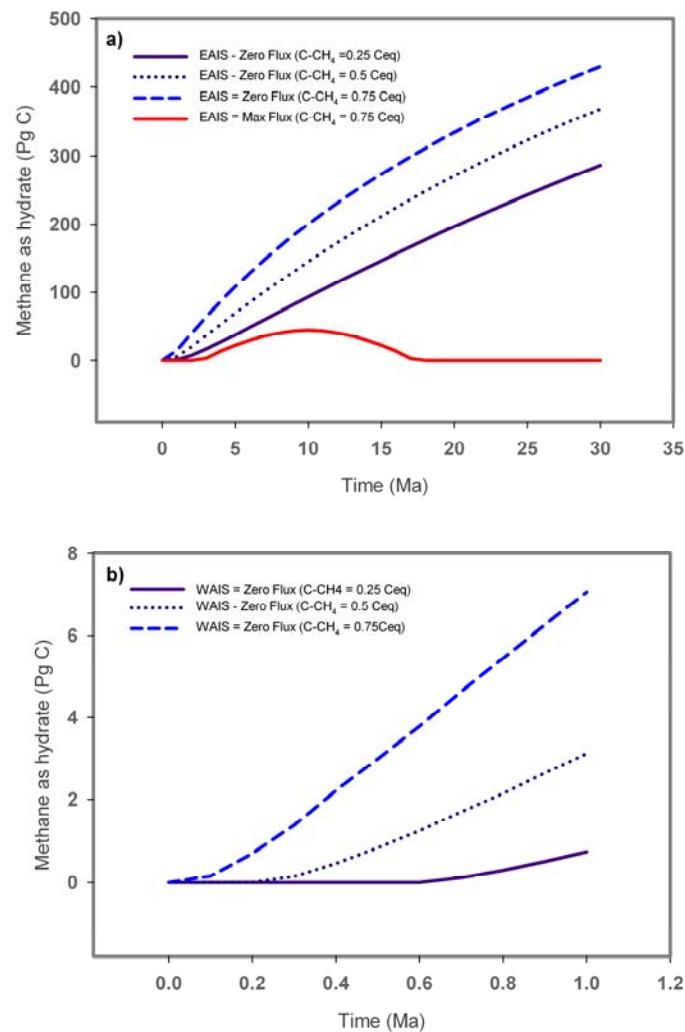

e. **Calculation of total carbon present in Antarctic sedimentary basins**

The total amount of organic carbon (TOC) present in marine sedimentary basins at the time of ice sheet growth is calculated based on the following assumptions. First, we assume that sedimentary basins are present beneath 50% of the WAIS ( $1 \times 10^6 \text{ km}^2$ ) and 25% of the EAIS ( $2.5 \times 10^6 \text{ km}^2$ )<sup>68</sup>. Second, we take 1 km as an estimate of the mean sediment depth present in these basins. This falls at the low end of values reported in the literature, which range from 0.2 to 14 km (Suppl. Table 1). We employ the parameter sets,  $v=0.1$ ,  $\text{TOC}(0,0)=1\%$  to provide initial modelled profiles of TOC with depth using the Reactive Continuum Model schema (see Supplementary Methods 2f; SF1). We subsequently calculate the mass of carbon within each cell within the 1000 x 1m sediment column at  $t=0$ , assuming a rock density of  $2650 \text{ kg m}^{-3}$  employing the modelled porosity profile (SF1). The TOC content of the 1000 m x 1m sediment column is multiplied by the area of the sedimentary basins (in  $\text{m}^2$ ) to give total organic carbon present in sedimentary basins (in PgC). These calculations give values of  $\sim 21,000 \text{ Pg C}$  ( $v=0.1$ ,  $\text{TOC}(0,0)=1\%$ ) for WAIS (6000 Pg C and EAIS (15,000 Pg C).

## Supplementary References

- 1 Ferraccioli, F., Armadillo, E., Jordan, T., Bozzo, E. & Corr, H. Aeromagnetic exploration over the East Antarctic Ice Sheet: A new view of the Wilkes Subglacial Basin. *Tectonophysics* **478**, 62-77, doi:DOI 10.1016/j.tecto.2009.03.013 (2009).
- 2 Studinger, M. *et al.* Geophysical models for the tectonic framework of the Lake Vostok region, East Antarctica. *Earth Planet Sc Lett* **216**, 663-677, doi:Doi 10.1016/S0012-821x(03)00548-X (2003).
- 3 Anandakrishnan, S. & Winberry, J. P. Antarctic subglacial sedimentary layer thickness from receiver function analysis. *Global Planet Change* **42**, 167-176, DOI 10.1016/j.gloplacha.2003.10.005 (2004).
- 4 Young, D. A. *et al.* A dynamic early East Antarctic Ice Sheet suggested by ice-covered fjord landscapes. *Nature* **474**, 72-75, doi:10.1038/nature10114 (2011).
- 5 Bell, R. E. *et al.* Influence of subglacial geology on the onset of a West Antarctic ice stream from aerogeophysical observations. *Nature* **394**, 58-62 (1998).
- 6 King, E. C., Woodward, J. & Smith, A. M. Seismic and radar observations of subglacial bed forms beneath the onset zone of Rutford Ice Stream Antarctica. *J Glaciol* **53**, 665-672 (2007).
- 7 Barker, P. F., A Camerlenghi, G. D. Acton. Leg 178 Summary. Proceedings of the Ocean Drilling Programme – Initial Reports, **178**, 60 (1999).
- 8 Kelly, S. R. A., Ditchfield, P. W., Doubleday, P. A. & Marshall, J. D. An Upper Jurassic Methane-Seep Limestone from the Fossil Bluff Group Fore-Arc Basin of Alexander Island, Antarctica. *J Sediment Res A* **65**, 274-282 (1995).
- 9 Bohrmann, G. *et al.* Hydrothermal activity at Hook Ridge in the Central Bransfield Basin, Antarctica. *Geo-Mar Lett* **18**, 277-284 (1999).
- 10 Claypool, G., T. D. Lorenson, C.A. Johnson. Authigenic carbonates, methane generation, and oxidation in continental rise and shelf sediments, ODP leg 188, Sites 1165 and 1166, Prydz Bay,

- Offshore Antarctica (Prydz Bay), Proceedings of the Ocean Drilling Programme - Scientific Results. **188**, 15 (2003).
- 11 Lonsdale, M. J. The relationship between silica diagenesis, methane and seismic reflections on the South Orkney Microcontinent. *Proceedings of the Ocean Drilling Programme, Scientific Results* **113**, 37 (1990).
- 12 Bellanca, A., Aghib, F., Neria, R. & Sabatino, N. Bulk carbonate isotope stratigraphy from CRP-3 core (Victoria Land Basin, Antarctica): evidence for Eocene-Oligocene palaeoclimatic evolution. *Global Planet Change* **45**, 237-247, doi:DOI 10.1016/j.gloplacha.2004.06.014 (2005).
- 13 DeConto, R. M. & Pollard, D. A coupled climate-ice sheet modeling approach to the Early Cenozoic history of the Antarctic ice sheet. *Palaeogeogr Palaeocl* **198**, 39-52, doi:Doi 10.1016/S0031-0182(03)00393-6 (2003).
- 14 Pollard, D. & DeConto, R. M. Modelling West Antarctic ice sheet growth and collapse through the past five million years. *Nature* **458**, 329-U389, doi:Doi 10.1038/Nature07809 (2009).
- 15 Huybers, P. & Denton, G. Antarctic temperature at orbital timescales controlled by local summer duration. *Nat Geosci* **1**, 787-792, doi:Doi 10.1038/Ngeo311 (2008).
- 16 Pattyn, F. Antarctic subglacial conditions inferred from a hybrid ice sheet/ice stream model. *Earth Planet Sc Lett* **295**, 451-461 (2010).
- 17 Studinger, M., Bell, R. E., Buck, W. R., Karner, G. D. & Blankenship, D. D. Sub-ice geology inland of the Transantarctic Mountains in light of new aerogeophysical data. *Earth Planet Sc Lett* **220**, 391-408, doi:Doi 10.1016/S0012-821x(04)00066-4 (2004).
- 18 Ferraccioli, F. *et al.* Rifted(?) crust at the East Antarctic Craton margin: gravity and magnetic interpretation along a traverse across the Wilkes Subglacial Basin region. *Earth Planet Sc Lett* **192**, 407-421 (2001).
- 19 Bamber, J. L. *et al.* East Antarctic ice stream tributary underlain by major sedimentary basin. *Geology* **34**, 33-36, doi:Doi 10.1130/G22160.1 (2006).

- 20 Rippin, D. M., Bamber, J. L., Siegert, M. J., Vaughan, D. G. & Corr, H. F. J. The role of ice thickness and bed properties on the dynamics of the enhanced-flow tributaries of Bailey Ice Stream and Slessor Glacier, East Antarctica. *Annals of Glaciology, Vol 39, 2005* **39**, 366-372 (2004).
- 21 Fedorov, L., Grikurov, G., Kurinen, R. & Masolov, V. in *Antarctic Geoscience* (ed Craddock C) 931-936 (University of Wisconsin Press 1982).
- 22 Morgan, V. I. & Budd, W. F. Radio-echosounding of the Lambert Glacier basin. *J Glaciol* **15**, 103-111 (1975).
- 23 Drewry, D. J. Sedimentary Basins of East Antarctic Craton from Geophysical Evidence. *Tectonophysics* **36**, 301-314 (1976).
- 24 Behrendt, J. C. Crustal and lithospheric structure of the West Antarctic Rift System from geophysical investigations - a review. *Global Planet Change* **23**, 25-44 (1999).
- 25 Studinger, M., Bell, R., Finn, C. A. & Blankenship, D. Mesozoic and Cenozoic extensional tectonics of the West Antarctic Rift System from high-resolution airborne geophysical mapping, Vol. Royal Society of New Zealand Bulletin, **35** , 563-569 (Royal Society of New Zealand) (2002).
- 26 Cooper, A. K., Davey, F. J. & Behrendt, J. C. Seismic stratigraphy and structure of the Victoria Land basin , Western Ross Sea, Antarctica, in *The Antarctic Continental Margin: Geology and Geophysics of the Western Ross Sea* (eds A.K. Cooper & F.J. Davey) 27-66 (Circum-Pacific Council for Energy and Mineral Resources) (1987).
- 27 Karner, G. D., Studinger, M. & Bell, R. E. Gravity anomalies of sedimentary basins and their mechanical implications: Application to the Ross Sea basins, West Antarctica. *Earth Planet Sc Lett* **235**, 577-596, doi:DOI 10.1016/j.epsl.2005.04.016 (2005).
- 28 Trehu, A., Behrendt, J. & Fritsch, J. C. Generalises crustal structure of the Central Basin, Ross Sea, Antarctica. *Geol Jahrbuch* **47**, 291-312 (1993).



- 29 Cooper, A. K., Davey, F. J. & Hinz, K. Crustal extension and origin of sedimentary basins beneath the Ross Sea and Ross Ice Shelf, in *Geological Evolution of Antarctica* eds M.R.A. Thomson, J.A. Crame, & J.W. Thomson), 285-292 (Cambridge University Press) (1991).
- 30 Rooney, S. T., Blankenship, D. & Bentley, C. R. Seismic refraction measurements of crustal structure in West Antarctica, in *Gondwana Six: Structure, Tectonics and Geophysics* Vol. 40 (ed G.D. McKenzie), **40**, 1-7 (AGU) (1987).
- 31 Bougamont, M., Hunke, E. C. & Tulaczyk, S. Sensitivity of ocean circulation and sea-ice conditions to loss of West Antarctic ice shelves and ice sheet. *J Glaciol* **53**, 490-498 (2007).
- 32 Peters, L. E. *et al.* Subglacial sediments as a control on the onset and location of two Siple Coast ice streams, West Antarctica. *J Geophys Res-Sol Ea* **111**, -, doi:Artn B01302  
Doi 10.1029/2005jb003766 (2006).
- 33 Munson, C. G., Bentley, C. R. & The crustal structure beneath ice stream C and Ridge BC, W. A., from seismic refraction and gravity measurements. in *Recent Progress in Antarctic Earth Science* (ed Y. Yoshida) 507-514 (Terra. Sci., 1992).
- 34 Bindschadler, R., Vornberger, P., Blankenship, D., Scambos, T. & Jacobel, R. Surface velocity and mass balance of Ice Streams D and E, West Antarctica. *J Glaciol* **42**, 461-475 (1996).
- 35 Winberry, J. P. & Anandakrishnan, S. Crustal structure of the West Antarctic rift system and Marie Byrd Land hotspot. *Geology* **32**, 977-980, doi:Doi 10.1130/G20768.1 (2004).
- 36 Willerslev, E. *et al.* Ancient biomolecules from deep ice cores reveal a forested Southern Greenland. *Science* **317**, 111-114, doi:DOI 10.1126/science.1141758 (2007).
- 37 Hall, B. L. & Denton, G. H. Holocene history of the Wilson Piedmont Glacier along the southern Scott Coast, Antarctica. *Holocene* **12**, 619-627, doi:Doi 10.1191/0959683602hl572rp (2002).
- 38 Henrikson, N., Higgs, A. K., Kalsbeek, F. & Pulvertaft, T. C. R. Greenland from Archaean to Quaternary. *Geology of Greenland Survey Bulletin*, 93 (2000).
- 39 Tenbrink, N. W. & Weidick, A. Greenland Ice Sheet History since Last Glaciation. *Quaternary Res* **4**, 429-& (1974).

- 40 Skidmore, M. L., Foght, J. M. & Sharp, M. J. Microbial Life beneath a High Arctic Glacier. *Appl. Environ. Microbiol.* **66**, 3214-3220, doi:10.1128/aem.66.8.3214-3220.2000 (2000).
- 41 Yamamoto, S., Alcauskas, J. B. & Crozier, T. E. Solubility of methane in distilled water and seawater. *Journal of Chemical & Engineering Data* **21**, 78-80, doi:10.1021/jc60068a029 (1976).
- 42 Bottrell, S. H. & Tranter, M. Sulphide oxidation under partially anoxic conditions at the bed of the Haut Glacier d'Arolla, Switzerland. *Hydrol Process* **16**, 2363-2368, doi:Doi 10.1002/Hyp.1012 (2002).
- 43 Wadham, J. L., Bottrell, S., Tranter, M. & Raiswell, R. Stable isotope evidence for microbial sulphate reduction at the bed of a polythermal high Arctic glacier. *Earth Planet Sc Lett* **219**, 341-355, doi:Doi 10.1016/S0012-821x(03)00683-6 (2004).
- 44 Reeburgh, W. S., S.C. Whalen, M.J. Alperin. The role of methanotrophy in the global methane budget, in *Microbial growth on C1 compounds, Washington D.C* ( Eds. J.C. Murrell, D.P. Kelly), 1-14 (Intercept Ltd., Andover, Hants, UK).
- 45 Krauskopf, K. B. *Introduction to Geochemistry*. (McGraw-Hill Science/Engineering/Math, 1994).
- 46 Tulaczyk, S., Kamb, B., Scherer, R. P. & Engelhardt, H. F. Sedimentary processes at the base of a West Antarctic ice stream: Constraints from textural and compositional properties of subglacial debris. *J Sediment Res* **68**, 487-496 (1998).
- 47 Wellsbury, P., Mather, I. & Parkes, R. J. Geomicrobiology of deep, low organic carbon sediments in the Woodlark Basin, Pacific Ocean. *Fems Microbiol Ecol* **42**, 59-70, doi:Pii S0168-6496(02)00305-7 (2002).
- 48 Hinrichs, K. U., Boetius, A. The anaerobic oxidation of methane: new insights in microbial ecology and biogeochemistry, in *Ocean Margin Systems* (eds G. Wefer *et al.*), 457-477 (Springer-Verlag, 2002).

- 49 Borowski, W. S., Paull, C. K. & Ussler, W. Marine pore-water sulfate profiles indicate in situ methane flux from underlying gas hydrate. *Geology* **24**, 655-658, doi:10.1130/0091-7613(1996)024<0655:mpwspi>2.3.co;2 (1996).
- 50 Valentine, D. L. & Reeburgh, W. S. New perspectives on anaerobic methane oxidation. *Environ Microbiol* **2**, 477-484 (2000).
- 51 Davie, M. K. & Buffett, B. A. A numerical model for the formation of gas hydrate below the seafloor. *J Geophys Res-Sol Ea* **106**, 497-514 (2001).
- 52 Davie, M. K. & Buffett, B. A. A steady state model for marine hydrate formation: Constraints on methane supply from pore water sulfate profiles. *J Geophys Res-Sol Ea* **108**, -, Doi 10.1029/2002jb002300 (2003).
- 53 Buffett, B. & Archer, D. Global inventory of methane clathrate: sensitivity to changes in the deep ocean. *Earth Planet Sc Lett* **227**, 185-199 (2004).
- 54 Bougamont, M. & Tulaczyk, S. Glacial erosion beneath ice streams and ice-stream tributaries: constraints on temporal and spatial distribution of erosion from numerical simulations of a West Antarctic ice stream. *Boreas* **32**, 178-190, doi:Doi 10.1080/03009480310001092 (2003).
- 55 Jamieson, S. S. R., Hulton, N. R. J., Sugden, D. E., Payne, A. J. & Taylor, J. Cenozoic landscape evolution of the Lambert basin, East Antarctica: the relative role of rivers and ice sheets. *Global Planet Change* **45**, 35-49, doi:DOI 10.1016/j.gloplacha.2004.09.015 (2005).
- 56 Bahr, D. B., Hutton, E. W. H., Syvitski, J. P. M. & Pratson, L. F. Exponential approximations to compacted sediment porosity profiles. *Comput Geosci-Uk* **27**, 691-700 (2001).
- 57 Morin, R. H. *et al.* Heat Flow and Hydrologic Characteristics at the AND-1B borehole, ANDRILL McMurdo Ice Shelf Project, Antarctica. *Geosphere* **6**, 370-378, doi:Doi 10.1130/Ges00512.1 (2010).

- 58 Shapiro, N. M. & Ritzwoller, M. H. Inferring surface heat flux distributions guided by a global seismic model: particular application to Antarctica. *Earth Planet Sc Lett* **223**, 213-224, doi:DOI 10.1016/j.epsl.2004.04.011 (2004).
- 59 Maule, C. F., Purucker, M. E., Olsen, N. & Mosegaard, K. Heat flux anomalies in Antarctica revealed by satellite magnetic data. *Science* **309**, 464-467, doi:DOI 10.1126/science.1106888 (2005).
- 60 Arnosti, C., Jorgensen, B. B., Sagemann, J. & Thamdrup, B. Temperature dependence of microbial degradation of organic matter in marine sediments: polysaccharide hydrolysis, oxygen consumption, and sulfate reduction. *Mar Ecol-Prog Ser* **165**, 59-70 (1998).
- 61 Boudreau, B. P. & Ruddick, B. R. On a Reactive Continuum Representation of Organic-Matter Diagenesis. *Am J Sci* **291**, 507-538 (1991).
- 62 Tarutis Jr, W. J. On the equivalence of the power and reactive continuum models of organic matter diagenesis. *Geochim Cosmochim Ac* **57**, 1349-1350 (1993).
- 63 Arndt, S., Hetzel, A. & Brumsack, H. J. Evolution of organic matter degradation in Cretaceous black shales inferred from authigenic barite: A reaction-transport model. *Geochim Cosmochim Ac* **73**, 2000-2022, doi:DOI 10.1016/j.gca.2009.01.018 (2009).
- 64 Florindo, F. *et al.* Magnetobiostratigraphic chronology and palaeoenvironmental history of Cenozoic sequences from ODP sites 1165 and 1166, Prydz Bay, Antarctica. *Palaeogeogr Palaeoclimatol* **198**, 69-+, doi:Doi 10.1016/S0031-0182(03)00395-X (2003).
- 65 Rabouille, C., Gaillard, J. F., Relexans, J. C., Treguer, P. & Vincendeau, M. A. Recycling of organic matter in Antarctic sediments: A transect through the polar front in the Southern Ocean (Indian Sector). *Limnol Oceanogr* **43**, 420-432 (1998).
- 66 Kettler, R. M. Results of Whole-Rock Organic Geochemical Analyses of the CRP-3 Drillcore, Victoria Land Basin, Antarctica. *Terra Antarctica* **8**, 303-308 (2001).

- 67 Davie, M. K., Zatsepina, O. Y. & Buffett, B. A. Methane solubility in marine hydrate environments. *Mar Geol* **203**, 177-184, doi:Doi 10.1016/S0025-3227(03)00331-1 (2004).
- 68 Ivanov, V. L. Evolution of Antarctic Prospective Sedimentary Basins. *Antarct Sci* **1**, 51-56 (1989).
